# Supplementary material
Source: PubMed Central journal article supplement (PMC2757125)
Supplement: NIHMS90430-supplement-01.pdf [file NIHMS90430-supplement-01.pdf]

## Supplemental Data

### SIRT6 Links Histone H3 Lysine 9

### Deacetylation to NF- $\kappa$ B-Dependent Gene

### Expression and Organismal Life Span

Tiara L.A. Kawahara, Eriko Michishita, Adam S. Adler, Mara Damian, Elisabeth Berber, Meihong Lin, Ron A. McCord, Kristine C.L. Ongaigui, Lisa D. Boxer, Howard Y. Chang, Katrin F. Chua

#### SUPPLEMENTAL FIGURE LEGENDS

##### **Figure S1. SIRT6 and RELA interaction.**

(A) SIRT6 interacts specifically with RELA in endogenous co-IPs. Shown are Western blots of endogenous SIRT6 IPs or negative control anti-Flag IPs probed with antibodies specific for the indicated NF- $\kappa$ B family members. \*, antibody heavy chain; arrows indicate the expected sizes of p50 and p52.

(B) Co-IP of endogenous SIRT6 with endogenous RELA.

(C) RELA-SIRT6 interaction is independent of DNA bridging. Shown is Western blot analysis of RELA following FLAG IP from 293T cells expressing FLAG-SIRT6 or empty vector; IPs carried out +/- ethidium bromide (EtBr, 100 ug/ml).

(D) SIRT6 expression is not induced upon NF- $\kappa$ B activation. Western analysis with the indicated antibodies shows that SIRT6 levels do not change following TNF- $\alpha$  treatment. The expected acute decrease in I $\kappa$ B levels (upper band) is observed under these conditions, confirming the efficacy of the TNF- $\alpha$  treatment. The lower band is a non-specific cross-reacting protein.

##### **Figure S2. Interplay of SIRT6 and RELA on chromatin.**

(A) Immunoblot analysis of RELA in cells transfected with siRELA 1 and 2. siRELA 1 targets the same sequence as the shRELA used in Figure 2. siRELA 2 target sequence: CCCACGAGCTTGTAGGAAATT.

(B) RELA knock-down inhibits SIRT6 recruitment to promoters of NF- $\kappa$ B target genes. SIRT6 ChIPs were performed in HeLa cells transfected with siRELA 2 or control siRNAs, following treatment with TNF- $\alpha$  (20 ng/ml). SIRT6 occupancy (mean  $\pm$  s.e) is shown relative to untreated control cells.

(C) SIRT6 recruitment to NF- $\kappa$ B target genes is selective. *ATP2C1*, *PDZD2*, *TRIM25*, and *IAP2* are all induced by TNF- $\alpha$  and known to be direct RELA targets (Lim et al., 2007); however, SIRT6 is only detected at the *IAP2* promoter (upon TNF- $\alpha$  stimulation). Gene expression analysis in these same cells (Figure S4) confirmed that *IAP2* becomes hyperactivated in SIRT6 depleted cells while the other three genes do not. SIRT6 occupancy (mean  $\pm$  s.e) is shown relative to untreated control cells.

(D) SIRT6 limits RELA occupancy at the promoter of RELA target gene promoters. CHIP with  $\alpha$ -RELA antibodies was performed following continuous TNF- $\alpha$  treatment (20 ng/mL); RELA occupancy (mean  $\pm$  s.e) at the *IAP2* promoter relative to untreated control samples is shown.

(E) Hyper-acetylation of other histone acetylation sites is not observed in SIRT6-depleted cells. H4K8 acetylation (H4K8Ac) levels are not increased in SIRT6-knockdown (S6 sh2) cells compared to control (pSR) cells. H4K8Ac levels (mean  $\pm$  s.e) are normalized to control untreated cells. Similar results were observed at other promoters, and for H4K16 acetylation (data not shown).

### **Figure S3. SIRT6, H3K9Ac and RELA ChIP at NF- $\kappa$ B promoters in MEFs.**

(A) Wild-type and *RelA*<sup>-/-</sup> MEFs were treated with TNF- $\alpha$  (20 ng/mL) for 1 hour, and ChIP with an  $\alpha$ -Sirt6 antibody was performed. Shown is Sirt6 occupancy (mean  $\pm$  s.e) at the *Birc3* (murine homologue to *IAP2*) and *Il1rl1* promoters relative to untreated control samples. \*, p<0.05.

(B) Wild-type and *Sirt6*<sup>-/-</sup> MEFs were treated with TNF- $\alpha$  (20 ng/mL) for 1.5 hours, and ChIP with  $\alpha$ -H3K9Ac and  $\alpha$ -H3 antibodies was performed. Shown are H3K9Ac levels (mean  $\pm$  s.e) at the *Birc3* and *Il1rl1* promoters relative to untreated control samples and normalized to total H3 levels. \*, p<0.05.

(C) Wild-type and *Sirt6*<sup>-/-</sup> MEFs were treated with TNF- $\alpha$  (20 ng/mL) for 1.5 hours, and ChIP with  $\alpha$ -RELA antibodies was performed. Shown is RELA occupancy (mean  $\pm$  s.e) at the *Birc3* and *Il1rl1* promoters relative to untreated control samples. \*, p<0.05.

### **Figure S4. SIRT6 knockdown leads to NF- $\kappa$ B target gene induction**

(A) Gene expression analysis of genes enriched for NF- $\kappa$ B motifs in promoters and known NF- $\kappa$ B target genes (Hinata et al., 2003; Hinz et al., 2001) following TNF- $\alpha$  treatment (10 ng/ml) for the indicated times. \*, Genes verified by qRT-PCR.

(B) Increased expression of NF- $\kappa$ B target genes in SIRT6 knock-down (S6 sh2) cells. Shown is quantitative TaqMan real-time PCR analysis of the indicated mRNAs (mean  $\pm$  s.e), normalized to *GAPDH*.

(C) Increased expression of NF- $\kappa$ B target genes with SIRT6 knockdown depends on RELA. (Top) Western blots confirming siRNA-mediated RELA knockdown. (Bottom) Quantitative TaqMan real-time PCR analysis (mean  $\pm$  s.e) of *MnSOD*, normalized to *GAPDH*. A similar trend is observed for several other genes (data not shown).

(D) Levels of expression of RELA-dependent NF- $\kappa$ B family members in SIRT6 knockdown cells. Slight increases are seen for several family members, consistent with the observed increase in mRNA levels.

**Figure S5. No effects of SIRT6 on NF- $\kappa$ B release from I $\kappa$ B or direct deacetylation of RELA.**

(A) SIRT6 depletion has no effect on release and re-sequestration of RELA. Shown is the RELA DNA binding activity in HeLa cells following a 30 minute pulse of TNF- $\alpha$  treatment (2.5 ng/ml) by the NoShift ELISA assay (Novagen) (mean  $\pm$  s.d.).

(B) SIRT6 depletion does not affect I $\kappa$ B degradation but induces increased re-synthesis of I $\kappa$ B- $\alpha$ . Immunoblot of I $\kappa$ B- $\alpha$  in pSR and S6 sh2 HeLa cells following a 30 minute pulse of TNF- $\alpha$  treatment (2.5 ng/ml). Arrows point to time-points of I $\kappa$ B- $\alpha$  re-synthesis.

(C) SIRT6 does not deacetylate RELA in vitro. In vitro deacetylation reactions were carried out with the indicated purified recombinant proteins. Acetylated RELA was purified as follows: 293T cells were co-transfected with T7-RELA and p300 acetyltransferase and treated with TNF- $\alpha$  (20 ng/mL for .5 hours), and RELA protein was affinity purified with anti-T7 antibodies. Unacetylated RELA was purified from cells in the absence of p300 expression or TNF- $\alpha$ . These preparations of RELA were incubated with recombinant purified SIRT6 or SIRT1, or buffer control in NAD-dependent deacetylation reactions. SIRT1 efficiently deacetylates RELA, whereas SIRT6 does not.

**Figure S6. Representative genotyping and IGF-1 levels of cohort mice.**

(A) Representative genotyping of cohort mice. PCR analysis with primers designed for the wild-type and null alleles of *Sirt6* and *RelA* was performed to identify mice of the indicated genotypes. Genotyping primer sequences are:

GTGCATCTCAATGGTGCAGTGCATGTT (wild-type, 5'),

GCAATAGCATCACAAATTTACAAATA (knockout, 5'), and  
GTGTGATTGGTAGAGAGGCACGTGGAT (common, 3').

(B) Serum IGF-1 levels (mean  $\pm$  s.e.) in wild-type (n=5) and *Sirt6*<sup>-/-</sup>*RelA*<sup>+/-</sup> (n=6) mice at 25 and >90 days. *p*-value is indicated.

#### **Figure S7. Murine gene expression data.**

A) Shown is the expression of all direct NF- $\kappa$ B targets in wild-type and *Sirt6*<sup>-/-</sup> MEFs, based on Lim et al. (Lim et al., 2007). *Sirt6*-dependent targets are indicated on the right (56%); a gene is considered *Sirt6* dependent if its average fold induction upon TNF- $\alpha$  treatment is higher in *Sirt6*<sup>-/-</sup> as compared to wild-type.

(B) Shown is the average expression of genes within significantly induced or repressed Gene Ontology terms following treatment with TNF- $\alpha$  in wild-type and *Sirt6*<sup>-/-</sup> MEFs.

(C) Shown is the expression of NF- $\kappa$ B motif module genes in wild-type, *Sirt6*<sup>-/-</sup> and *Sirt6*<sup>-/-</sup>*RelA*<sup>+/-</sup> spleen tissues, all normalized to wild-type expression levels.

#### **Figure S8. Sirt6 Expression in young and old murine tissues.**

Shown is the western blot analysis of *Sirt6* protein in young (~3 month) and old (24–27 month) spleen and liver tissue.

**Table S1. *Sirt6*-dependent motif modules induced or repressed in seven *Sirt6*<sup>-/-</sup> tissues.** Listed are the motif modules that are induced (+) or repressed (–) upon *Sirt6* knockout in mouse. Notations following some transcription factor names (ex. Q6\_01) are identifiers for variants of the motifs according to TRANSFAC. Standalone sequences or sequences before a transcription factor name represent consensus binding motifs (key for combination of nucleotides: Y = C or T; R = A or G; W = A or T; S = C or G; K = T or G; M = C or A; N = unknown).

#### **Table S2. Primer sequences for the promoter regions of NF- $\kappa$ B target genes.**

#### **SUPPLEMENTAL REFERENCES**

Hinata, K., Gervin, A.M., Zhang, J.Y., and Khavari, P.A. (2003). Divergent gene regulation and growth effects by NF-kappa B in epithelial and mesenchymal cells of human skin. *Oncogene* 22, 1955-1964.

Hinz, M., Loser, P., Mathas, S., Krappmann, D., Dorken, B., and Scheidereit, C. (2001). Constitutive NF-kappaB maintains high expression of a characteristic gene network,

including CD40, CD86, and a set of antiapoptotic genes in Hodgkin/Reed-Sternberg cells. *Blood* 97, 2798-2807.

Lim, C.A., Yao, F., Wong, J.J., George, J., Xu, H., Chiu, K.P., Sung, W.K., Lipovich, L., Vega, V.B., Chen, J., *et al.* (2007). Genome-wide mapping of RELA(p65) binding identifies E2F1 as a transcriptional activator recruited by NF-kappaB upon TLR4 activation. *Mol Cell* 27, 622-635.
